# Supplementary material for: Ligand effect of cyclometallated iridium(iii) complexes on N-alkylation of amines in hydrogen borrowing reactions
Source: Royal Society of Chemistry journal article supplement (doi:10.1039/d3ra07184g), 2023-01-01
Supplement: d3ra07184g1.pdf [file d3ra07184g1.pdf]

## Supporting Information

### Ligand Effect of Cyclometallated Iridium (III) Complexes on N-Alkylation of Amines in Hydrogen Borrowing Reactions

Yi-Sheng Chen<sup>[a]</sup>, Siang-Yu Chiu<sup>[a]</sup>, Chia-Ying Li<sup>[a]</sup>, Tsun-Ren Chen\*<sup>[a]</sup>, and  
Jhy-Der Chen<sup>[b]</sup>

<sup>[a]</sup> Department of Applied Chemistry, National Pingtung University, Pingtung,  
Taiwan, 90003

<sup>[b]</sup> Department of Chemistry, Chung Yuan Christian University, Chung-Li,  
Taiwan, R.O.C.

| <b>Contents</b>                                                                                                                                        | <b>Page</b> |
|--------------------------------------------------------------------------------------------------------------------------------------------------------|-------------|
| Crystal data for <b>Cat. 1~7</b>                                                                                                                       | S3          |
| Table S1. Crystal data for <b>Cat. 1 ~ Cat. 3</b>                                                                                                      | S3          |
| Table S2. Selected bond distance (Å) and bond angles for <b>Cat. 1~3</b>                                                                               | S4          |
| Table S3. Crystal data for <b>Cat. 4 and Cat. 5</b>                                                                                                    | S6          |
| Table S4. Crystal data for <b>Cat. 6 and Cat. 7</b>                                                                                                    | S7          |
| Table S5. Selected bond distance (Å) and bond angles for <b>Cat. 4~7</b>                                                                               | S8          |
| Figure S1 Theoretical calculation data of <b>Cat.2</b> and <b>4-7</b> , including the orbital distribution and composition of HOMO and LUMO            | S10         |
| Structural data of Benzoxazole Derivative Ligands                                                                                                      | S11         |
| Structural data of Dinuclear Iridium Precursors (C <sup>N</sup> ) <sub>2</sub> Ir(μ-Cl) <sub>2</sub> Ir(C <sup>N</sup> ) <sub>2</sub> ( <b>D1~D5</b> ) | S12         |
| Structural Data of Catalysts (C <sup>N</sup> ) <sub>2</sub> Ir(Cl) (TPP) (Cat.1~7)                                                                     | S13         |
| Structural data of N-alkylation Products.                                                                                                              | S15         |
| The Atomic Coordinates of <b>Cat. 1~7</b>                                                                                                              | S23         |
| Table S6. The Atomic Coordinates (angstroms) of <b>Cat. 1</b>                                                                                          | S23         |
| Table S7. The Atomic Coordinates (angstroms) of <b>Cat. 2</b>                                                                                          | S25         |
| Table S8. The Atomic Coordinates (angstroms) of <b>Cat. 3</b>                                                                                          | S27         |
| Table S9. The Atomic Coordinates (angstroms) of <b>Cat. 4</b>                                                                                          | S29         |
| Table S10. The Atomic Coordinates (angstroms) of <b>Cat. 5</b>                                                                                         | S31         |
| Table S11. The Atomic Coordinates (angstroms) of <b>Cat. 6</b>                                                                                         | S33         |
| Table S12. The Atomic Coordinates (angstroms) of <b>Cat. 7</b>                                                                                         | S35         |

**I. Crystal data for Cat. 1~7**

**Table S1.** Crystal data for **Cat. 1 ~ Cat. 3**

| Cat.                                                   | 1                                                                   | 2                                                                     | 3                                                                                     |
|--------------------------------------------------------|---------------------------------------------------------------------|-----------------------------------------------------------------------|---------------------------------------------------------------------------------------|
| empirical formula                                      | C <sub>42</sub> H <sub>35</sub> Cl <sub>5</sub> Ir N <sub>2</sub> P | C <sub>50</sub> H <sub>45</sub> Cl Ir N <sub>2</sub> O <sub>3</sub> P | C <sub>42</sub> H <sub>32</sub> Cl <sub>5</sub> F <sub>3</sub> Ir N <sub>2</sub><br>P |
| fw                                                     | 968.14                                                              | 980.50                                                                | 1022.11                                                                               |
| temp [K]                                               | 110(2)                                                              | 296(2)                                                                | 296(2)                                                                                |
| radiated used ( $\lambda$ [Å])                         | 0.71073                                                             | 0.71073                                                               | 0.71073                                                                               |
| cryst size [mm <sup>3</sup> ]                          | 0.66 x 0.56 x 0.54                                                  | 0.200 x 0.100 x 0.100                                                 | 0.200 x 0.100 x<br>0.100                                                              |
| cryst syst                                             | Triclinic                                                           | Triclinic                                                             | Triclinic                                                                             |
| space group                                            | P -1                                                                | P-1                                                                   | P-1                                                                                   |
| a [Å]                                                  | 11.0738(5)                                                          | 12.911(6)                                                             | 11.250(13)                                                                            |
| b [Å]                                                  | 13.2326(6)                                                          | 13.195(6)                                                             | 13.317(16)                                                                            |
| c [Å]                                                  | 13.7902(5)                                                          | 14.842(7)                                                             | 14.035(17)                                                                            |
| $\alpha$ [deg]                                         | 83.693(3)°                                                          | 82.321(12)°                                                           | 84.55(3)°.                                                                            |
| $\beta$ [deg]                                          | 70.637(3)°                                                          | 72.051(10)°                                                           | 74.18(3)°.                                                                            |
| $\gamma$ [deg]                                         | 82.745(4)°                                                          | 63.435(10)°                                                           | 83.10(3)°.                                                                            |
| $V$ [Å <sup>3</sup> ], Z                               | 1886.19(14), 4                                                      | 2151.4(18) ,2                                                         | 2004(4) , 2                                                                           |
| $\rho_{\text{calcd}}$ [g.cm <sup>-3</sup> ]            | 1.705                                                               | 1.514                                                                 | 1.694                                                                                 |
| $\mu$ [mm <sup>-1</sup> ]                              | 3.970 mm <sup>-1</sup>                                              | 3.247                                                                 | 3.752                                                                                 |
| F(000)                                                 | 956                                                                 | 984                                                                   | 1004                                                                                  |
| scan rang $\theta$ [deg]                               | 2.88 to 29.21°                                                      | 1.442 to 26.000°.                                                     | 1.511 to 25.998°.                                                                     |
| no. of total refins                                    | 16612                                                               | 42883                                                                 | 40353                                                                                 |
| no. of unique refins                                   | 8694 [R(int) = 0.0221]                                              | 8448 [R(int) = 0.1296]                                                | 7871 [R(int) =<br>0.1774]                                                             |
| no. of data/restraints/<br>params                      | 8694 / 0 / 460                                                      | 8448 / 1 / 523                                                        | 7871 / 0 / 487                                                                        |
| goodness-of-fit on F <sup>2</sup>                      | 0.986                                                               | 0.940                                                                 | 0.973                                                                                 |
| R <sub>1</sub> , wR <sub>2</sub> [ $I > \sigma 2(I)$ ] | 0.0217 and 0.0474                                                   | R1 = 0.0451, wR2 = 0.0547                                             | R1 = 0.0609, wR2<br>= 0.0736                                                          |
| R <sub>1</sub> , wR <sub>2</sub> (all data)            | 0.0257 and 0.0479                                                   | R1 = 0.0881, wR2 = 0.0629                                             | R1 = 0.1289, wR2<br>= 0.0882                                                          |

**Table S2.** Selected bond distance (Å) and bond angles for **Cat. 1~3**.

| <b>Cat. 1</b>  |            |                |            |
|----------------|------------|----------------|------------|
| Ir-C(22)       | 2.004(2)   | Ir-N(1)        | 2.062(2)   |
| Ir-C(11)       | 2.044(2)   | Ir-P           | 2.4074(6)  |
| Ir-N(2)        | 2.053(2)   | Ir-Cl(1)       | 2.4919(6)  |
| C(22)-Ir-C(11) | 89.14(9)   | N(2)-Ir-P      | 89.94(6)   |
| C(22)-Ir-N(2)  | 80.64(9)   | N(1)-Ir-P      | 98.60(6)   |
| C(11)-Ir-N(2)  | 91.70(9)   | C(22)-Ir-Cl(1) | 172.90(7)  |
| C(22)-Ir-N(1)  | 93.60(9)   | C(11)-Ir-Cl(1) | 86.98(7)   |
| C(11)-Ir-N(1)  | 80.05(9)   | N(2)-Ir-Cl(1)  | 93.53(6)   |
| N(2)-Ir-N(1)   | 170.06(8)  | N(1)-Ir-Cl(1)  | 91.58(6)   |
| C(22)-Ir-P     | 94.17(6)   | P-Ir-Cl(1)     | 89.85(2)   |
| C(11)-Ir-P     | 176.51(7)  |                |            |
| <b>Cat. 2</b>  |            |                |            |
| Ir-C(22)       | 2.012(5)   | Ir-N(1)        | 2.066(4)   |
| Ir-C(11)       | 2.049(5)   | Ir-P           | 2.4388(16) |
| Ir-N(2)        | 2.058(4)   | Ir-Cl          | 2.4861(15) |
| C(22)-Ir-C(11) | 89.91(18)  | N(2)-Ir-P      | 91.12(12)  |
| C(22)-Ir-N(2)  | 80.74(19)  | N(1)-Ir-P      | 97.32(13)  |
| C(11)-Ir-N(2)  | 91.65(18)  | C(22)-Ir-Cl    | 172.91(15) |
| C(22)-Ir-N(1)  | 95.85(18)  | C(11)-Ir-Cl    | 87.62(13)  |
| C(11)-Ir-N(1)  | 80.00(19)  | N(2)-Ir-Cl     | 92.68(12)  |
| N(2)-Ir-N(1)   | 171.03(16) | N(1)-Ir-Cl     | 90.27(11)  |
| C(22)-Ir-P     | 92.27(14)  | P-Ir-Cl        | 90.49(6)   |
| C(11)-Ir-P     | 176.71(14) |                |            |
| <b>Cat. 3</b>  |            |                |            |
| Ir-C(12)       | 2.002(9)   | Ir-N(2)        | 2.064(6)   |
| Ir-C(11)       | 2.041(8)   | Ir-P           | 2.419(3)   |
| Ir-N(1)        | 2.064(6)   | Ir-Cl(1)       | 2.499(3)   |
| C(12)-Ir-C(11) | 88.1(3)    | N(1)-Ir-P      | 98.36(18)  |
| C(12)-Ir-N(1)  | 94.2(3)    | N(2)-Ir-P      | 90.42(18)  |
| C(11)-Ir-N(1)  | 79.8(3)    | C(12)-Ir-Cl(1) | 172.1(2)   |
| C(12)-Ir-N(2)  | 79.8(3)    | C(11)-Ir-Cl(1) | 87.3(2)    |

Iridium/Graphene Nanostructured Catalyst for the N-Alkylation of Amines to Synthesize Nitrogen-containing Derivatives and Heterocyclic Compounds in Green Process

|               |          |               |           |
|---------------|----------|---------------|-----------|
| C(11)-Ir-N(2) | 91.6(3)  | N(1)-Ir-Cl(1) | 91.29(17) |
| N(1)-Ir-N(2)  | 169.7(2) | N(2)-Ir-Cl(1) | 93.9(2)   |
| C(12)-Ir-P    | 94.1(2)  | P-Ir-Cl(1)    | 90.76(8)  |
| C(11)-Ir-P    | 177.2(3) |               |           |

**Table S3.** Crystal data for **Cat. 4** and **Cat. 5**

| <b>Cat.</b>                                            | <b>4</b>                                                                           | <b>5</b>                                                                           |
|--------------------------------------------------------|------------------------------------------------------------------------------------|------------------------------------------------------------------------------------|
| empirical formula                                      | C <sub>49</sub> H <sub>41</sub> Cl <sub>5</sub> Ir N <sub>2</sub> O <sub>5</sub> P | C <sub>47</sub> H <sub>35</sub> Cl <sub>3</sub> Ir N <sub>2</sub> O <sub>5</sub> P |
| fw                                                     | 1138.26                                                                            | 1037.29                                                                            |
| temp [K]                                               | 293(2)                                                                             | 296(2)                                                                             |
| radiated used ( $\lambda$ [Å])                         | 0.71073                                                                            | 0.71073                                                                            |
| cryst size [mm <sup>3</sup> ]                          | 0.800 x 0.300 x 0.200                                                              | 0.500 x 0.500 x 0.500                                                              |
| cryst syst                                             | Triclinic                                                                          | Triclinic                                                                          |
| space group                                            | P-1                                                                                | P-1                                                                                |
| a [Å]                                                  | 12.34(2)                                                                           | 12.499(3)                                                                          |
| b [Å]                                                  | 12.49(2)                                                                           | 14.154(3)                                                                          |
| c [Å]                                                  | 16.46(4)                                                                           | 16.193(3)                                                                          |
| $\alpha$ [deg]                                         | 86.17(5)°.                                                                         | 85.480(6)°.                                                                        |
| $\beta$ [deg]                                          | 69.00(5)°.                                                                         | 87.279(6)°.                                                                        |
| $\gamma$ [deg]                                         | 88.19(5)°.                                                                         | 65.482(6)°.                                                                        |
| $V$ [Å <sup>3</sup> ], $Z$                             | 2364(8) , 2                                                                        | 2597.9(9) , 2                                                                      |
| $\rho_{\text{calcd}}$ [g.cm <sup>-3</sup> ]            | 1.599                                                                              | 1.326                                                                              |
| $\mu$ [mm <sup>-1</sup> ]                              | 3.189                                                                              | 2.795                                                                              |
| F(000)                                                 | 1132                                                                               | 1028                                                                               |
| scan rang $\theta$ [deg]                               | 1.327 to 25.998°.                                                                  | 1.585 to 26.000°.                                                                  |
| no. of total refins                                    | 9296                                                                               | 35372                                                                              |
| no. of unique refins                                   | 9296 [R(int) = ?]                                                                  | 10226 [R(int) = 0.0793]                                                            |
| no. of data/restraints/ params                         | 9296 / 0 / 563                                                                     | 10226 / 0 / 532                                                                    |
| goodness-of-fit on F <sup>2</sup>                      | 1.060                                                                              | 1.031                                                                              |
| R <sub>1</sub> , wR <sub>2</sub> [ $I > \sigma 2(I)$ ] | R1 = 0.0526, wR2 = 0.1074                                                          | R1 = 0.0419, wR2 = 0.0914                                                          |
| R <sub>1</sub> , wR <sub>2</sub> (all data)            | R1 = 0.0804, wR2 = 0.1246                                                          | R1 = 0.0616, wR2 = 0.0998                                                          |

**Table S4.** Crystal data for **Cat. 6** and **Cat. 7**

| <b>Cat.</b>                                            | <b>6</b>                             | <b>7</b>                           |
|--------------------------------------------------------|--------------------------------------|------------------------------------|
| empirical formula                                      | C47.60 H38.80 Cl F4 Ir N2<br>O7.30 P | C47.25 H37.50 Cl3.50 Ir N2<br>O6 P |
| fw                                                     | 1090.23                              | 1076.54                            |
| temp [K]                                               | 297(2)                               | 296(2) K                           |
| radiated used ( $\lambda$ [Å])                         | 0.71073                              | 0.71073 Å                          |
| cryst size [mm <sup>3</sup> ]                          | 0.42 x 0.39 x 0.23                   | 0.300 x 0.100 x 0.100              |
| cryst syst                                             | Orthorhombic                         | Triclinic                          |
| space group                                            | P b c a                              | P-1                                |
| a [Å]                                                  | 19.1611(8)                           | a = 13.2859(8)                     |
| b [Å]                                                  | 20.4125(9)                           | b = 13.4065(8)                     |
| c [Å]                                                  | 23.7193(10)                          | c = 15.6834(10)                    |
| $\alpha$ [deg]                                         | 90°.                                 | = 103.2380(15)°                    |
| $\beta$ [deg]                                          | 90°.                                 | = 90.1227(16)°                     |
| $\gamma$ [deg]                                         | 90°.                                 | = 117.8150(14)°                    |
| $V$ [Å <sup>3</sup> ], Z                               | 9277.2(7) , 8                        | 2385.7(3), 2                       |
| $\rho_{\text{calcd}}$ [g.cm <sup>-3</sup> ]            | 1.561                                | 1.499                              |
| $\mu$ [mm <sup>-1</sup> ]                              | 3.039                                | 3.075                              |
| F(000)                                                 | 4334                                 | 1069                               |
| scan rang $\theta$ [deg]                               | 1.69 to 26.01°.                      | 1.747 to 26.000°.                  |
| no. of total refins                                    | 50639                                | 33139                              |
| no. of unique refins                                   | 9119 [R(int) = 0.0427]               | 9373 [R(int) = 0.1131]             |
| no. of data/restraints/ params                         | 9119 / 0 / 640                       | 9373 / 3 / 550                     |
| goodness-of-fit on F <sup>2</sup>                      | 1.047                                | 1.005                              |
| R <sub>1</sub> , wR <sub>2</sub> [ $I > \sigma 2(I)$ ] | R1 = 0.0324, wR2 = 0.1027            | R1 = 0.0602, wR2 = 0.1364          |
| R <sub>1</sub> , wR <sub>2</sub> (all data)            | R1 = 0.0535, wR2 = 0.1171            | R1 = 0.1096, wR2 = 0.1565          |

**Table S5.** Selected bond distance (Å) and bond angles for **Cat. 4~7**.

| <b>Cat. 4</b>  |            |                |            |
|----------------|------------|----------------|------------|
| Ir-C(1)        | 2.050(8)   | Ir-N(1)        | 2.095(6)   |
| Ir-C(14)       | 2.084(9)   | Ir-P(1)        | 2.427(4)   |
| Ir-N(2)        | 2.091(7)   | Ir-Cl(1)       | 2.463(4)   |
| C(1)-Ir-C(14)  | 89.6(3)    | N(2)-Ir-P(1)   | 100.2(2)   |
| C(1)-Ir-N(2)   | 92.8(3)    | N(1)-Ir-P(1)   | 90.9(2)    |
| C(14)-Ir-N(2)  | 80.2(3)    | C(1)-Ir-Cl(1)  | 174.6(2)   |
| C(1)-Ir-N(1)   | 81.3(3)    | C(14)-Ir-Cl(1) | 87.3(2)    |
| C(14)-Ir-N(1)  | 89.1(3)    | N(2)-Ir-Cl(1)  | 91.10(19)  |
| N(2)-Ir-N(1)   | 167.8(2)   | N(1)-Ir-Cl(1)  | 94.14(19)  |
| C(1)-Ir-P(1)   | 94.8(2)    | P(1)-Ir-Cl(1)  | 88.17(11)  |
| C(14)-Ir-P(1)  | 175.5(2)   |                |            |
| <b>Cat. 5</b>  |            |                |            |
| Ir-C(14)       | 2.018(5)   | Ir-N(1)        | 2.226(4)   |
| Ir-N(2)        | 2.080(4)   | Ir-Cl(1)       | 2.3751(13) |
| Ir-C(1)        | 2.106(5)   | Ir-P           | 2.3972(14) |
| C(14)-Ir-N(2)  | 80.17(17)  | C(1)-Ir-Cl(1)  | 84.34(12)  |
| C(14)-Ir-C(1)  | 89.94(18)  | N(1)-Ir-Cl(1)  | 87.71(11)  |
| N(2)-Ir-C(1)   | 92.07(15)  | C(14)-Ir-P     | 89.93(14)  |
| C(14)-Ir-N(1)  | 167.63(17) | N(2)-Ir-P      | 90.24(10)  |
| N(2)-Ir-N(1)   | 95.63(14)  | C(1)-Ir-P      | 177.63(12) |
| C(1)-Ir-N(1)   | 78.53(16)  | N(1)-Ir-P      | 101.77(11) |
| C(14)-Ir-Cl(1) | 95.67(15)  | Cl(1)-Ir-P     | 93.31(5)   |
| N(2)-Ir-Cl(1)  | 174.53(10) |                |            |
| <b>Cat. 6</b>  |            |                |            |
| Ir-C(26)       | 2.047(4)   | Ir-N(1)        | 2.081(4)   |
| Ir-N(2)        | 2.049(4)   | Ir-P           | 2.4145(14) |
| Ir-C(13)       | 2.080(5)   | Ir-Cl          | 2.4465(12) |
| C(26)-Ir-N(2)  | 79.42(17)  | C(13)-Ir-P     | 173.97(14) |
| C(26)-Ir-C(13) | 89.23(19)  | N(1)-Ir-P      | 99.40(11)  |
| N(2)-Ir-C(13)  | 92.4(2)    | C(26)-Ir-Cl    | 170.24(13) |



Iridium/Graphene Nanostructured Catalyst for the N-Alkylation of Amines to Synthesize Nitrogen-containing Derivatives and Heterocyclic Compounds in Green Process

|               |            |             |           |
|---------------|------------|-------------|-----------|
| C(26)-Ir-N(1) | 96.53(17)  | N(2)-Ir-Cl  | 94.08(12) |
| N(2)-Ir-N(1)  | 171.52(16) | C(13)-Ir-Cl | 83.73(14) |
| C(13)-Ir-N(1) | 80.07(19)  | N(1)-Ir-Cl  | 88.93(11) |
| C(26)-Ir-P    | 96.80(13)  | P-Ir-Cl     | 90.25(4)  |
| N(2)-Ir-P     | 88.52(12)  |             |           |

**Cat. 7**

|                |           |                |           |
|----------------|-----------|----------------|-----------|
| Ir-C(13)       | 2.033(9)  | Ir-N(2)        | 2.067(7)  |
| Ir-N(1)        | 2.046(7)  | Ir-P           | 2.416(2)  |
| Ir-C(26)       | 2.062(10) | Ir-Cl(1)       | 2.480(2)  |
| C(13)-Ir-N(1)  | 80.7(3)   | C(26)-Ir-P     | 174.3(3)  |
| C(13)-Ir-C(26) | 88.3(4)   | N(2)-Ir-P      | 100.5(2)  |
| N(1)-Ir-C(26)  | 90.5(3)   | C(13)-Ir-Cl(1) | 171.6(3)  |
| C(13)-Ir-N(2)  | 91.3(3)   | N(1)-Ir-Cl(1)  | 93.4(2)   |
| N(1)-Ir-N(2)   | 167.5(3)  | C(26)-Ir-Cl(1) | 85.8(3)   |
| C(26)-Ir-N(2)  | 79.5(3)   | N(2)-Ir-Cl(1)  | 93.40(19) |
| C(13)-Ir-P     | 97.3(3)   | P-Ir-Cl(1)     | 88.58(8)  |
| N(1)-Ir-P      | 90.2(2)   |                |           |

| Cat.                                                                                                                   | 2                                                                                 | 4                                                                                 | 5                                                                                 | 6                                                                                  | 7                                                                                   |
|------------------------------------------------------------------------------------------------------------------------|-----------------------------------------------------------------------------------|-----------------------------------------------------------------------------------|-----------------------------------------------------------------------------------|------------------------------------------------------------------------------------|-------------------------------------------------------------------------------------|
| LUMO                                                                                                                   |  |  |  |  |  |
|                                                                                                                        | Composition<br>5.19% Ir<br>35.65% Ph<br>17.04% Py                                 | Composition<br>5.50% Ir<br>22.64% Ph<br>17.47% Ox                                 | Composition<br>5.48% Ir<br>29.09% Ph<br>18.94% Ox                                 | Composition<br>5.30% Ir<br>32.06% Ph<br>18.21% Ox                                  | Composition<br>3.02% Ir<br>19.47% Ph<br>20.50% Ox                                   |
| HOMO                                                                                                                   |  |  |  |  |  |
|                                                                                                                        | Composition<br>5.19% Ir<br>34.92% Ph<br>16.86% C^N                                | Composition<br>4.75% Ir<br>29.86% Ph<br>21.72% Ox                                 | Composition<br>4.19% Ir<br>32.35% Ph<br>24.05% Ox                                 | Composition<br>3.97% Ir<br>33.02% Ph<br>17.71% Ox                                  | Composition<br>3.33% Ir<br>22.72% Ph<br>27.43% Ox                                   |
| Ph: The phenyl group of the C^N ligand<br>Py: The pyridyl of C^N ligands<br>Ox : The benzoxazole groups of C^N ligands |                                                                                   |                                                                                   |                                                                                   |                                                                                    |                                                                                     |

**Figure S1.** Theoretical calculation data of **Cat.2** and **4-7**, including the orbital distribution and composition of HOMO and LUMO

## II. Structural Data of Benzoxazole Derivative Ligands

2-phenylbenzoxazole (pbo) (**L2**): 80% yield. <sup>1</sup>H NMR (300 MHz, CDCl<sub>3</sub>, 298 K; δ (ppm)): 8.28–8.25 (m, 2H), 7.80–7.76 (m, 1H), 7.60–7.56 (m, 1H), 7.53–7.51 (m, 3H), 7.37–7.33 (m, 2H). <sup>13</sup>C NMR (75 MHz, CDCl<sub>3</sub>, 298 K; δ (ppm)): δ163.2, 151.0, 142.3, 131.7, 129.1, 127.8, 127.4, 125.3, 124.8, 120.263, 110.8. Anal. Calcd for C<sub>13</sub>H<sub>9</sub>NO (MW = 195.22): C, 79.98; H, 4.65; N, 7.18. Found: C, 79.99; H, 4.65; N, 7.20%. MS (FAB; m/z): 195.0686

2-(4-Chlorophenyl)benzoxazole (cpbo) (**L3**): 75% yield. <sup>1</sup>H NMR (300 MHz, CDCl<sub>3</sub>, 298 K; δ (ppm)): 8.17 (d, J = 8.7 Hz, 2H), 7.77–7.74 (m, 1H), 7.57–7.54 (m, 1H), 7.48 (d, J = 8.7 Hz, 2H), 7.38–7.33 (m, 2H). <sup>13</sup>C NMR (75 MHz, CDCl<sub>3</sub>, 298 K; δ (ppm)): 162.2, 150.9, 142.2, 137.9, 129.4, 129.0, 125.8, 125.5, 124.9, 120.3, 110.8. Anal. Calcd for C<sub>13</sub>H<sub>8</sub>NOCl (MW = 229.67): C, 67.98; H, 3.51; N, 6.10. Found: C, 67.98; H, 3.53; N, 6.11%. MS (FAB; m/z):229.0303

2-(3,5-Difluorophenyl)benzoxazole (fpbo) (**L4**): 88% yield. <sup>1</sup>H NMR (300 MHz, CDCl<sub>3</sub>, 298 K; δ (ppm)): 7.80–7.74 (m, 3H), 7.59–7.56 (m, 1H), 7.41–7.36 (m, 2H), 7.00–6.96 (m, 1H). <sup>13</sup>C NMR (75 MHz, CDCl<sub>3</sub>, 298 K; δ (ppm)): 165.1, 164.9, 161.8, 161.7, 160.9, 151.0, 141.9, 130.4, 130.3, 130.1, 126.1, 125.2, 120.6, 110.9, 110.8, 110.7, 110.6, 107.3, 107.0, 106.7. Anal. Calcd for C<sub>13</sub>H<sub>7</sub>NO F<sub>2</sub> (MW = 231.20): C, 67.53; H, 3.05; N, 6.06. Found: C, 67.50; H, 3.08; N, 5.99%. MS (FAB; m/z): 231.0496

2-Phenyl-5-chlorobenzoxazole (pcbo) (**L5**): 75% yield. <sup>1</sup>H NMR (300 MHz, CDCl<sub>3</sub>, 298 K; δ (ppm)): 8.23–8.20 (m, 2H), 7.66 (d, J = 8.7 Hz, 1H), 7.58 (d, J = 1.8 Hz, 1H), 7.55–7.49 (m, 3H), 7.32 (dd, J = 8.7, 1.8 Hz, 1H). <sup>13</sup>C NMR (75 MHz,

CDCl<sub>3</sub>, 298 K;  $\delta$  (ppm)): 163.9, 151.1, 141.1, 132.0, 130.9, 129.2, 127.8, 126.9, 125.5, 120.7, 111.4. Anal. Calcd for C<sub>13</sub>H<sub>8</sub>NOCl (MW = 229.67): C, 67.98; H, 3.51; N, 6.10. Found: C, 67.91; H, 3.52; N, 6.09%. MS (FAB; m/z): 229.0300

### III. Structural Data of Dinuclear Iridium Precursors (C<sup>^</sup>N)<sub>2</sub>Ir( $\mu$ -Cl)<sub>2</sub>Ir(C<sup>^</sup>N)<sub>2</sub> (D1~D5)

**(pp)<sub>2</sub>Ir( $\mu$ -Cl)<sub>2</sub>Ir(pp)<sub>2</sub> (D1):** 85% yield. <sup>1</sup>H NMR (300 MHz, DMSO-d<sub>6</sub>, 298 K;  $\delta$  (ppm)): 8.39–8.35 (m, 4H), 8.18–8.14 (m, 4H), 7.53–7.47 (m, 4H), 7.44–7.35 (m, 6H), 7.16–8.12 (m, 2H), 6.93–6.87 (m, 2H). Anal. Calcd for C<sub>44</sub>H<sub>22</sub>N<sub>4</sub>Cl<sub>2</sub>Ir<sub>2</sub> (MW = 1072.09): C, 49.29; H, 3.01; N, 5.23%. Found: C, 49.67; H, 3.08; N, 5.31%. MS (FAB; m/z): 1070.9610

**(pbo)<sub>2</sub>Ir( $\mu$ -Cl)<sub>2</sub>Ir(pbo)<sub>2</sub> (D2):** 90% yield. <sup>1</sup>H NMR (300 MHz, DMSO-d<sub>6</sub>, 298 K;  $\delta$  (ppm)): 7.78–7.76 (m, 4H), 7.75–7.73 (m, 10H), 7.52–7.49 (m, 4H), 7.43–7.41 (m, 4H), 7.40–7.36 (m, 10H). Anal. Calcd for C<sub>52</sub>H<sub>32</sub>N<sub>4</sub>O<sub>4</sub>Cl<sub>2</sub>Ir<sub>2</sub> (MW = 1232.17): C, 50.69; H, 2.61; N, 4.55%. Found: C, 50.67; H, 2.63; N, 4.51%. MS (FAB; m/z): 1231.8585

**(cpbo)<sub>2</sub>Ir( $\mu$ -Cl)<sub>2</sub>Ir(cpbo)<sub>2</sub> (D3):** 88% yield. <sup>1</sup>H NMR (300 MHz, DMSO-d<sub>6</sub>, 298 K;  $\delta$  (ppm)): 8.76–8.73 (m, 2H), 8.09–8.54 (m, 4H), 7.95 (d, J = 8.4 Hz, 2H), 7.84–7.60 (m, 8H), 7.48 (dd, J = 8.2, 2.1 Hz, 2H), 7.38 (t, J = 8.4 Hz, 2H), 7.14 (t, J = 8.4 Hz, 2H), 7.03 (dd, J = 8.1, 1.8 Hz, 2H), 6.40 (d, J = 7.8 Hz, 2H), 6.0 (d, J = 2.1 Hz, 2H). Anal. Calcd for C<sub>52</sub>H<sub>28</sub>N<sub>4</sub>O<sub>4</sub>Cl<sub>6</sub>Ir<sub>2</sub> (MW = 1369.98): C, 45.59; H, 2.06; N, 4.09%. Found: C, 45.67; H, 2.10; N, 4.11%. MS (FAB; m/z): 1367.9515

**(fpbo)<sub>2</sub>Ir( $\mu$ -Cl)<sub>2</sub>Ir(fpbo)<sub>2</sub> (D4):** 78% yield. <sup>1</sup>H NMR (300 MHz, DMSO-d<sub>6</sub>, 298 K;  $\delta$  (ppm)): 8.18 (d, J = 8.18, 8.1 Hz, 4H), 7.31 (dd, J = 7.6, 2.7 Hz, 4H), 7.22–7.12 (m, 8H),

6.99 (dt,  $J = 7.1, 1.5$  Hz, 4H), 6.14 (dt,  $J = 9.6, 2.7$  Hz, 4H).  $^{13}\text{C}$  NMR (75 MHz,  $\text{CDCl}_3$ , 298 K;  $\delta$  (ppm)): 174.9, 169.2, 169.1, 167.5, 167.4, 160.3, 160.2, 158.7, 158.6, 149.1, 140.8, 133.6, 133.5, 133.4, 133.3, 125.1, 124.4, 118.0, 115.3, 115.0, 110.9, 108.6, 108.4, 107.2, 107.0, 106.8, 31.8, 31.1, 22.8, 14.3. Anal. Calcd for  $\text{C}_{52}\text{H}_{24}\text{N}_4\text{O}_4\text{Cl}_2\text{F}_8\text{Ir}_2$  (MW = 1376.12): C, 45.38; H, 1.76; N, 4.07%. Found: C, 45.80; H, 1.80; N, 4.03%. MS (FAB;  $m/z$ ): 1376.0319.

**(pcbo)<sub>2</sub>Ir( $\mu$ -Cl)<sub>2</sub>Ir(pcbo)<sub>2</sub> (D5):** 80% yield.  $^1\text{H}$  NMR (300 MHz,  $\text{DMSO-d}_6$ , 298 K;  $\delta$  (ppm)): 8.22 (d,  $J = 1.8$  Hz, 4H), 7.65 (dd,  $J = 7.8, 1.2$  Hz, 4H), 7.36 (d,  $J = 9$  Hz, 4H), 7.1 (dd,  $J = 8.7, 2.1$  Hz, 4H), 6.87 (dt,  $J = 7.4, 1.2$  Hz, 4H), 6.68 (dt,  $J = 7.4, 1.2$  Hz, 4H), 6.17 (d,  $J = 7.8$  Hz, 4H). Anal.  $\text{C}_{52}\text{H}_{28}\text{N}_4\text{O}_4\text{Cl}_6\text{Ir}_2$  (MW = 1369.98): C, 45.59; H, 2.06; N, 4.09%. Found: C, 45.38; H, 2.08; N, 4.05%. MS (FAB;  $m/z$ ): 1367.9504.

#### IV. Structural Data of Catalysts ( $\text{C}^{\wedge}\text{N}$ )<sub>2</sub>Ir(Cl) (TPP) (Cat.1~7)

**(pp)<sub>2</sub>Ir(Cl)(TPP) (Cat. 1):**  $^1\text{H}$  NMR (300 MHz,  $\text{DMSO-d}_6$ , 298 K;  $\delta$  (ppm)): 9.194 (d,  $J=6\text{Hz}$ , 1H), 8.849 (d,  $J=5.4\text{Hz}$ , 1H), 7.883 (d,  $J=7.8\text{Hz}$ , 1H), 7.565 (d,  $J=7.8\text{Hz}$ , 1H), 7.083 (t,  $J=6.9\text{Hz}$ , 4H), 6.832 (t,  $J=7.2\text{Hz}$ , 1H), 6.803 (t,  $J=5.7\text{Hz}$ , 1H), 6.693 (t,  $J=5.7\text{Hz}$ , 1H), 5.888 (d,  $J=7.8\text{Hz}$ , 1H), 5.835 (d,  $J=6.75\text{Hz}$ , 1H). Anal. Calcd for  $\text{C}_{40}\text{H}_{31}\text{N}_2\text{ClIr}$  (MW = 798.3282): C, 60.18; H, 3.91; N, 3.51%. Found: C, 60.67; H, 3.85; N, 3.49%. MS (FAB;  $m/z$ ): 798.2241

**(pp)<sub>2</sub>Ir(Cl)(TMPP) (Cat. 2):**  $^1\text{H}$  NMR (300 MHz,  $\text{DMSO-d}_6$ , 298 K;  $\delta$  (ppm)): 9.306 (d,  $J=5.4\text{Hz}$ , 1H), 8.523 (d,  $J=5.4\text{Hz}$ , 1H), 7.878 (d,  $J=8.4\text{Hz}$ , 1H), 7.563 (d,  $J=8.4\text{Hz}$ , 1H), 7.535 (d,  $J=7.8\text{Hz}$ , 1H), 7.473 (t,  $J=7.8\text{Hz}$ , 1H), 7.428 (d,  $J=7.2\text{Hz}$ , 1H), 7.129 (t,  $J=9\text{Hz}$ , 3H), 6.836~6.792 (m, 1H), 6.611 (d,  $J=7.2\text{Hz}$ , 3H), 5.929 (d,  $J=7.8\text{Hz}$ , 1H) Anal. Calcd

for  $C_{43}H_{37}N_2O_3ClPIr$  (MW = 888.4043): C, 58.13; H, 4.20; N, 3.15%. Found: C, 58.67; H, 4.30; N, 3.17%. HMS (FAB; m/z): 888.2559

**(pp)<sub>2</sub>Ir(Cl)(TFPP) (Cat. 3):** <sup>1</sup>H NMR (300 MHz, DMSO-d<sub>6</sub>, 298 K; δ (ppm)): 8.715( d, J=5.4Hz, 1H), 7.907( d, J=8.4Hz, 1H), 7.725( t, J=7.8Hz, 1H), 7.576( d, J=9.6Hz, 1H), 7.529( t, J=7.8Hz, 1H), 7.496( d, J=4.2Hz, 1H), 7.240~7.180( m, 4H), 6.576( t, J=8.1Hz, 1H), 5.819( t, J=6.6Hz, 1H) Anal. Calcd for  $C_{40}H_{28}N_2ClF_3PIr$  (MW = 852.2999): C, 56.37; H, 3.31; N, 3.29%. Found: C, 56.67; H, 3.30; N, 3.31%. HMS (FAB; m/z): 852.1959.

**(pbo)<sub>2</sub>Ir(Cl)(TMPP) (Cat. 4):** <sup>1</sup>H NMR (300 MHz, DMSO-d<sub>6</sub>, 298 K; δ (ppm)): 8.585( d, J=8.4Hz, 1H), 7.739( d, J=7.8Hz, 1H), 7.637( d, J=8.4Hz, 1H), 7.559( d, J=7.8Hz, 1H), 7.349( d, J=8.4Hz, 1H), 7.301( t, J=8.1Hz, 1H), 7.111( t, J=7.8Hz, 1H), 7.067( d, J=7.8Hz, 1H), 6.815( t, J=7.5Hz, 1H), 6.699( t, J=6.4Hz, 1H), 6.479( d, J=7.2Hz, 3H). Anal. Calcd for  $C_{47}H_{37}N_2O_5ClPIr$  (MW = 968.4451): C, 58.29; H, 3.85; N, 2.89%. Found: C, 58.67; H, 3.80; N, 2.81%. HMS (FAB; m/z): 968.2458

**(cpbo)<sub>2</sub>Ir(Cl)(TMPP) (Cat. 5):** <sup>1</sup>H NMR (300 MHz, DMSO-d<sub>6</sub>, 298 K; δ (ppm)): 7.711( d, J=8.4Hz, 1H), 7.688( d, J=1.8Hz, 1H), 7.674( d, J=1.8Hz, 1H), 7.456( d, J=7.8Hz, 1H), 7.104( t, J=7.8Hz, 1H), 7.067( d, J=4.2Hz, 1H), 6.968( t, J=8.1Hz, 1H), 6.942( t, J=8.1Hz, 1H), 6.883( d, J=4.2Hz, 1H), 6.507( d, J=8.1Hz, 3H), 6.286( d, J=3.9Hz, 1H), 6.042( d, J=7.8Hz, 1H). Anal. Calcd for  $C_{47}H_{35}N_2O_5Cl_3PIr$  (MW = 1037.3355): C, 54.42; H, 3.40; N, 2.70%. Found: C, 54.67; H, 3.30; N, 2.75%. HMS (FAB; m/z): 1037.1667

**(fpbo)<sub>2</sub>Ir(Cl)(TMPP) (Cat. 6):** <sup>1</sup>H NMR (300 MHz, DMSO-d<sub>6</sub>, 298 K; δ (ppm)): 8.529( d,

J=7.8Hz, 1H), 7.626( d, J=8.4Hz, 1H), 7.428( d, J=3.6Hz, 1H), 7.305( t, J=7.5Hz, 2H), 7.150( d, J=5.1Hz, 1H), 7.063( t, J=7.5Hz, 2H), 6.512( s, 3H), 6.297~6.260( m, 2H) Anal. Calcd for C<sub>47</sub>H<sub>33</sub>N<sub>2</sub>O<sub>5</sub>ClF<sub>4</sub>PIr (MW = 1040.4074): C, 54.26; H, 3.20; N, 2.69%. Found: C, 54.37; H, 3.18; N, 2.71%. HMS (FAB; m/z): 1040.2081

**(pcbo)<sub>2</sub>Ir(Cl)(TMPP) (Cat. 7):** <sup>1</sup>H NMR (300 MHz, DMSO-d<sub>6</sub>, 298 K; δ (ppm)): 8.490 (d, J=1.8Hz, 1H), 7.745( d, J=7.8Hz, 1H), 7.620( d, J=3.9Hz, 1H), 7.577( d, J=9Hz, 1H), 7.348( s, 1H), 7.302~7.240( m, 3H), 6.968( t, J=7.5Hz, 2H), 6.764~6.739( m, 5H) Anal. Calcd for C<sub>47</sub>H<sub>35</sub>N<sub>2</sub>O<sub>5</sub>Cl<sub>3</sub>PIr (MW = 1037.3355): C, 54.42; H, 3.40; N, 2.70%. Found: C, 54.47; H, 3.50; N, 2.65%. MS (FAB; m/z): 1037.2559

## V. Structural Data of N-alkylation Products.

**N-benzylaniline (P<sub>1</sub>):** <sup>1</sup>H NMR (d-chloroform, 600MHz) = 7.38-7.33 (m, Ar, 4H), 7.28-7.25 (m, Ar, 1H), 7.19-7.16 (m, Ar, 2H), 6.73-6.68 (t, Ar, 1H), 6.65-6.63 (d, Ar, 2H, J<sub>HH</sub> = 7.8Hz), 4.33 (s, CH<sub>2</sub>, 2H), 4.02 (br. s, NH, 1H). <sup>13</sup>C NMR (d-Chloroform, 150MHz) = 148.2, 139.4, 129.3, 128.7, 127.5, 127.3, 117.6, 112.8, 48.3. MS (ESI/CI): m/z = 183.02, Calculated for C<sub>13</sub>H<sub>13</sub>N: 183.26 g/mol.

**N-(p-chlorobenzyl)aniline (P<sub>2</sub>):** <sup>1</sup>H NMR (d-chloroform, 600MHz) = 7.29 (s, 3H, Ar), 7.17-7.11 (m, 2H, Ar), 6.73-6.68 (m, 1H, Ar), 6.58-6.59 (m, 2H, Ar), 4.28 (d, 2H, J<sub>HH</sub> = 5.4Hz), 4.05 (br. s, NH, 1H). <sup>13</sup>C NMR (d-Chloroform, 150MHz) = 147.8, 137.8, 132.9, 129.3, 128.8, 128.7, 117.8, 112.9, 47.506. MS (ESI/CI): m/z = 216.98, Calculated for

$C_{13}H_{12}NCl^+ [M]^+$ : 217.68 g/mol.

***N*-(4-methoxybenzyl)aniline (P3)**:  $^1H$  NMR (d-chloroform, 600MHz) = 7.29-7.27 (d, JHH = 8.4Hz, 2H, Ar), 7.18-7.15 (m, 2H, Ar), 6.88-6.86 (m, 2H, Ar), 6.72-6.69 (t, 1H, Ar), 6.63-6.62 (m, 2H, Ar), 4.24 (br. s, NH, 1H), 3.91 (d, JHH = 13.2Hz, 1H), 3.79 (s, 3H).  $^{13}C$  NMR (d-Chloroform, 150MHz) = 158.9, 148.2, 131.4, 129.3, 128.8, 117.5, 113.8, 112.8, 55.3, 47.8. MS (ESI/CI):  $m/z$  = 213.21, Calculated for  $C_{14}H_{15}NO^+ [M]^+$  : 213.28 g/mol.

***N*-benzyl, *N*-(4-chlorophenyl)amine (P4)** :  $^1H$  NMR (d-chloroform, 600MHz) = 7.34-7.20 (m, Ar, 4H), 7.11-7.07 (m, Ar, 2H), 6.55-6.5102 (m, Ar, 2H), 4.62 (s, 1H), 4.30, 4.29 (d, CH<sub>2</sub>, 2H, JHH = 6.0Hz), 4.05(br. s, NH, 1H).  $^{13}C$  NMR (d-Chloroform, 150MHz) = 146.7, 138.8, 128.9, 128.7, 127.5, 127.4, 127.1, 126.6, 122.1, 113.9, 54.5, 48.4. MS (ESI/CI):  $m/z$  = 217.14, Calculated for  $C_{13}H_{12}NCl^+ [M]^+$ : 217.70 g/mol.

***N*-(4-chlorobenzyl), *N*-(4-chlorophenyl)amine (P5)**

$^1H$  NMR (d-chloroform, 600MHz) = 7.39 (d, JHH = 9Hz, 2H, Ar), 7.31 (d, JHH = 9Hz, 2H, Ar), 7.03 (d, JHH = 9Hz, 2H, Ar), 6.57 (d, JHH = 9Hz, 2H, Ar), 4.32 (s, 2H).  $^{13}C$  NMR (d-Chloroform, 150MHz) = 147.2, 138.9, 132.3, 129.0, 128.8, 128.1, 121.8, 114.9, 47.1. MS (ESI/CI):  $m/z$  = 253.21, Calculated for  $C_{13}H_{11}NCl_2^+ [M]^+$  : 252.14 g/mol.



***N*-(4-methoxybenzyl), *N*-(4-chlorophenyl)amine (P6)**

$^1\text{H}$  NMR (d-chloroform, 600MHz) = 7.13 (d, JHH = 9Hz, 2H, Ar), 7.04 (d, JHH = 9Hz, 2H, Ar), 6.89 (d, JHH = 9Hz, 2H, Ar), 6.58(d, JHH = 9Hz, 2H, Ar), 4.32 (s, 2H), 3.79 (s, -OCH<sub>3</sub>, 3H).  $^{13}\text{C}$  NMR (d-Chloroform, 150MHz) = 160.1, 147.3 132.4, 129.0, 128.4, 121.8, 114.9, 114.2, 56.1, 47.1. MS (ESI/CI): m/z = 248.21, Calculated for C<sub>14</sub>H<sub>14</sub>NOCl<sup>+</sup> [M]<sup>+</sup>: 247.72 g/mol.

***N*-benzyl, *N*-(4-methoxyphenyl)amine (P7):**  $^1\text{H}$  NMR (d-chloroform, 600MHz) = 7.37-7.32 (m, Ar, 4H), 7.27-7.25 (t, Ar, 1H), 6.77-6.76 (m, Ar, 2H), 6.59-6.60 (m, Ar, 2H), 4.27 (s, CH<sub>2</sub>, 2H), 3.73 (s, CH<sub>3</sub>, 3H).  $^{13}\text{C}$  NMR (CDCl<sub>3</sub>, 150MHz)  $\delta$  (ppm) = 152.2, 142.5, 139.7, 128.6, 127.6, 127.2, 114.9, 114.1, 55.8, 49.3. MS (ESI/CI): m/z = 213.05, Calculated for C<sub>14</sub>H<sub>15</sub>NO<sup>+</sup> [M]<sup>+</sup>: 213.28g/mol.

***N*-(4-chlorobenzyl), *N*-(4-methoxyphenyl)amine (P8)**

$^1\text{H}$  NMR (d-chloroform, 600MHz) = 7.38 (d, JHH = 9Hz, 2H, Ar), 7.30(d, JHH = 9Hz, 2H, Ar), 6.76 (d, JHH = 9Hz, 2H, Ar), 6.68(d, JHH = 9Hz, 2H, Ar), 4.31 (s, 2H), 3.78 (s, -OCH<sub>3</sub>, 3H).  $^{13}\text{C}$  NMR (d-Chloroform, 150MHz) = 152.7, 141.6, 138.9, 132.4, 128.8, 128.1, 115.4, 115.1, 56.1, 47.1. MS (ESI/CI): m/z = 248.61, Calculated for C<sub>14</sub>H<sub>14</sub>NOCl<sup>+</sup> [M]<sup>+</sup>:

247.72 g/mol.

***N*-(4-methoxybenzyl), *N*-(4-methoxyphenyl)amine (P9)**

$^1\text{H}$  NMR (d-chloroform, 600MHz) = 7.12 (d, JHH = 9Hz, 2H, Ar), 6.88 (d, JHH = 9Hz, 2H, Ar), 6.78 (d, JHH = 9Hz, 2H, Ar), 6.70(d, JHH = 9Hz, 2H, Ar), 4.32 (s, 2H), 3.90 (s, -OCH<sub>3</sub>, 3H), 3.78 (s, -OCH<sub>3</sub>, 3H).  $^{13}\text{C}$  NMR (d-Chloroform, 150MHz) = 160.1, 152.7, 141.6, 132.4, 128.4, 115.4, 115.1, 114.2, 57.5, 56.1, 47.1. MS (ESI/CI): m/z = 242.21, Calculated for C<sub>15</sub>H<sub>17</sub>NO<sub>2</sub><sup>+</sup> [M]<sup>+</sup>: 243.30g/mol.

***N*-hexylaniline (P10):**  $^1\text{H}$  NMR (d-chloroform, 600MHz) = 7.17-7.14 (m, Ar, 2H), 6.68-6.66 (m, Ar, 1H), 6.59-6.58 (m, Ar, 2H), 3.57 (br. s, NH, 1H), 3.11-3.0718 (t, 2H), 1.62-1.55 (m, 2H), 1.45-1.39 (m, 2H), 0.96-0.93 (t, 3H).  $^{13}\text{C}$  NMR (d-Chloroform, 150MHz) = 148.6, 129.2, 117.7, 112.7, 43.7, 31.7, 28.8, 27.4, 23.3, 134.0. MS (ESI/CI): m/z = 177.17, Calculated for C<sub>12</sub>H<sub>19</sub>N<sup>+</sup> [M]<sup>+</sup>: 177.29 g/mol.

***N*-hexyl, *N*-(4-chlorophenyl) amine (P11):**

$^1\text{H}$  NMR (d-chloroform, 600MHz) = 7.03 (d, JHH = 9Hz, 2H, Ar), 6.58 (d, JHH = 9Hz, 2H, Ar), 3.08 (m, 1H), 1.86(m, 2H), 1.60 (m, 2H), 1.25 (m, 2H), 1.12 (m, 2H),  $^{13}\text{C}$  NMR (d-Chloroform, 150MHz) = 147.9, 129.1, 119.7, 114.5, 52.6, 33.4, 25.9, 24.7. MS (ESI/CI):

$m/z = 210.21$ , Calculated for  $C_{12}H_{16}NCl^+ [M]^+$  : 209.71 g/mol.

***N*-hexyl, *N*-(4-methoxyphenyl) amine (P12):**

$^1H$  NMR (d-chloroform, 600MHz) = 6.77 (d, JHH = 9Hz, 2H, Ar), 6.69 (d, JHH = 9Hz, 2H, Ar), 3.79 (s, 1H), 3.37 (m, 1H), 1.60 (m, 2H), 1.46 (m, 2H), 1.16 (m, 4H),  $^{13}C$  NMR (d-Chloroform, 150MHz) = 151.8, 142.0, 115.3, 114.3, 56.1, 52.6, 33.4, 25.9, 24.7. MS (ESI/CI):  $m/z = 206.21$ , Calculated for  $C_{13}H_{19}NO^+ [M]^+$  : 205.29g/mol.

***N*-Benzylpyrrolidine (P13):**

$^1H$  NMR (d-chloroform, 600MHz) = 7.23 (m, 5H, Ar), 3.66 (s, 2H), 2.51 (m, 4H), 1.68 (m, 4H).  $^{13}C$  NMR (d-Chloroform, 150MHz) = 138.6, 128.7, 128.2, 127.2, 63.3, 54.4, 24.9. MS (ESI/CI):  $m/z = 162.21$ , Calculated for  $C_{11}H_{15}N^+ [M]^+$  : 161.24 g/mol.

***N*-(4-Chlorobenzyl)pyrrolidine (P14):**

$^1H$  NMR (d-chloroform, 600MHz) = 7.39 (d, JHH = 6Hz, 2H, Ar), 7.32 (d, JHH = 6Hz, 2H, Ar), 3.66 (s, 2H), 2.51 (m, 4H), 1.68 (m, 4H).  $^{13}C$  NMR (d-Chloroform, 150MHz) = 137.7, 131.7, 129.8, 128.2, 68.6, 54.4, 24.9. MS (ESI/CI):  $m/z = 195.21$ , Calculated for  $C_{11}H_{14}NCl^+ [M]^+$  : 195.69 g/mol.

**N-(4-Methoxybenzyl)pyrrolidine (P15):**

$^1\text{H}$  NMR (d-chloroform, 600MHz) = 7.13 (d, JHH = 9Hz, 2H, Ar), 6.89 (d, JHH = 9Hz, 2H, Ar), 3.79 (s, 3H), 3.66 (s, 2H), 2.51 (m, 4H), 1.68 (m, 4H).  $^{13}\text{C}$  NMR (d-Chloroform, 150MHz) = 160.4, 130.2, 129.1, 114.1, 63.6, 56.1, 54.4, 24.9. MS (ESI/CI):  $m/z$  = 192.21, Calculated for  $\text{C}_{12}\text{H}_{17}\text{NO}^+$  [M] $^+$  : 191.27 g/mol.

**Benzylpiperazine (P16):**  $^1\text{H}$  NMR ( $\text{CDCl}_3$ , 600MHz)  $\delta$  (ppm) = 7.29-7.22 (m, Ar, 5H), 3.56-3.40 (m, 4H), 2.89-2.86 (m, 4H), 2.41 (br. s, NH, 1H).  $^{13}\text{C}$  NMR ( $\text{CDCl}_3$ , 150MHz)  $\delta$  (ppm) = 137.8, 129.2, 128.1, 127.0, 64.0, 54.1, 45.8. HRMS (ESI/APCI):  $m/z$  = 177.2642 g/mol, calc'd. for  $\text{C}_{11}\text{H}_{17}\text{N}_2^+$  [M] $^+$ : 177.2644g/mol.

**(4-Chlorobenzyl) piperazine (P17):**

$^1\text{H}$  NMR (d-chloroform, 600MHz) = 7.40 (d, JHH = 9Hz, 2H, Ar), 7.32 (d, JHH = 9Hz, 2H, Ar), 3.66 (s, 2H), 2.68 (m, 4H), 2.34 (m, 4H).  $^{13}\text{C}$  NMR (d-Chloroform, 150MHz) = 137.7, 131.7, 129.4, 128.3, 63.4, 53.5, 46.7. MS (ESI/CI):  $m/z$  = 210.21, Calculated for  $\text{C}_{11}\text{H}_{14}\text{N}_2\text{Cl}^+$  [M] $^+$  : 209.69 g/mol.

**(4-Methoxybenzyl) piperazine (P18)**

$^1\text{H}$  NMR (d-chloroform, 600MHz) = 7.13 (d, JHH = 9Hz, 2H, Ar), 6.89 (d, JHH = 9Hz, 2H,

Ar), 3.79 (s,3H), 3.66 (s, 2H), 2.68 (m, 4H), 2.34 (m, 4H).  $^{13}\text{C}$  NMR (d-Chloroform, 150MHz) = 160.4, 130.2, 129.1, 114.35, 68.4, 56.1, 52.5, 45.7. MS (ESI/CI): m/z = 204.21, Calculated for  $\text{C}_{12}\text{H}_{17}\text{N}_2\text{O}^+ [\text{M}]^+$  : 205.27 g/mol.

**N-phenylpyrrolidine (P19):**  $^1\text{H}$  NMR (d-chloroform, 600MHz) = 7.26 (m, 2H), 7.12 (m, 1H), 6.84(m, 1H), 3.19–3.18 (m, 4H), 2.33 (s, 3H), 1.94-1.92 (m,4H).  $^{13}\text{C}$  NMR (d-Chloroform, 150MHz) = 148.6, 129.7, 115.8, 111.97, 47.9, 26.0. MS (ESI/CI): m/z =147.13, Calculated for  $\text{C}_{13}\text{H}_{13}\text{N}$ : 147.23 g/mol.

**N-phenylpiperidine (P20):**  $^1\text{H}$  NMR (d-chloroform, 600MHz) = 7.45 (t, 2H, J=7.4 Hz), 6.99 (d, 2H, J=7.8 Hz), 6.73 (t, 1H, J=7.3 Hz), 3.36 (t, 4H, J=6.7 Hz), 1.81 (m, 4H), 1.62 (t, 2H, J=4.8 Hz).  $^{13}\text{C}$  NMR ( $\text{CDCl}_3$ , 150MHz)  $\delta$  (ppm) = 152.6, 129.9, 119.7, 117.3, 60.12, 26.6, 24.9. MS (ESI/CI): m/z = 161.12, Calculated for  $\text{C}_{11}\text{H}_{15}\text{N}^+ [\text{M}]^+$ : 161.25 g/mol.

#### **N-phenylcycloheptamine (P21)**

$^1\text{H}$  NMR (d-chloroform, 600MHz) =7.30 (m, 2H, Ar), 6.91 (m, 2H, Ar), 6.71 (m, 1H, Ar), 3.36 (m, 4H), 1.78(m, 4H), 1.66 (m, 4H).  $^{13}\text{C}$  NMR (d-Chloroform, 150MHz) = 150.1, 130.3, 117.3, 114.4, 51.3, 27.6, 27.5. MS (ESI/CI): m/z = 174.81, Calculated for

$C_{12}H_{17}N^+ [M]^+$  : 175.27 g/mol.

**N-Methyl-N'-phenylpiperazine (P22):**  $^1H$  NMR (d-chloroform, 600MHz) = 8.21 (dd, 1H), 7.66 (ddd, 1H), 6.88 – 6.78 (m, 2H), 3.74 – 3.66 (m, 4H), 3.22 – 3.13 (m, 4H).  $^{13}C$  NMR (d-Chloroform, 150MHz) = 160.4, 147.9, 137.6, 110.1, 107.2, 46.1, 45.8. MS (ESI/CI):  $m/z = 177.23$ , Calculated for  $C_{11}H_{16}N_2^+ [M]^+$ : 176.25 g/mol.

**N-(4-Chlorophenyl), N'-methylpiperazine (P23):**  $^1H$  NMR (d-chloroform, 600MHz) = 7.13 (d, JHH = 9Hz, 2H, Ar), 6.72 (d, JHH = 9Hz, 2H, Ar), 3.44 (m, 4H), 2.35 (m, 4H), 2.20 (s, 3H).  $^{13}C$  NMR (d-Chloroform, 150MHz) = 149.0, 129.5, 123.1, 116.8, 52.7, 50.3, 46.1. MS (ESI/CI):  $m/z = 210.92$ , Calculated for  $C_{11}H_{15}N_2Cl^+ [M]^+$  : 210.70g/mol.

**N-(4-Methoxyphenyl), N'-methylpiperazine (P24):**  $^1H$  NMR (d-chloroform, 600MHz) = 6.74 (d, JHH = 9Hz, 2H, Ar), 6.65 (d, JHH = 9Hz, 2H, Ar), 3.79 (s, 3H), 3.41 (m, 4H), 2.35 (m, 4H), 2.20 (s, 3H).  $^{13}C$  NMR (d-Chloroform, 150MHz) = 152.6, 143.4, 117.5, 115.5, 56.1, 52.6, 50.1, 46.1. MS (ESI/CI):  $m/z = 205.92$ , Calculated for  $C_{12}H_{18}N_2O^+ [M]^+$  : 206.28 g/mol.

VI. The Atomic Coordinates of **Cat. 1~7**

**Table S6.** The Atomic Coordinates (angstroms) of **Cat. 1**

| Element | Coordinates (Angstroms) |        |        |
|---------|-------------------------|--------|--------|
|         | X                       | Y      | Z      |
| Ir      | 0.765                   | 0.7634 | 0.6258 |
| P       | 0.6883                  | 0.7259 | 0.8096 |
| Cl(1)   | 0.9909                  | 0.7284 | 0.6273 |
| N(1)    | 0.7717                  | 0.9187 | 0.6236 |
| N(2)    | 0.7515                  | 0.6147 | 0.6045 |
| C(1)    | 0.7221                  | 0.9773 | 0.7042 |
| C(2)    | 0.7366                  | 1.0795 | 0.6972 |
| C(3)    | 0.8057                  | 1.1259 | 0.6032 |
| C(4)    | 0.8507                  | 1.0683 | 0.5194 |
| C(5)    | 0.8307                  | 0.9655 | 0.5291 |
| C(6)    | 0.8667                  | 0.8996 | 0.4436 |
| C(7)    | 0.9211                  | 0.9357 | 0.3408 |
| C(8)    | 0.9509                  | 0.8693 | 0.2639 |
| C(9)    | 0.9259                  | 0.7678 | 0.2891 |
| C(10)   | 0.8709                  | 0.7322 | 0.3908 |
| C(11)   | 0.8403                  | 0.7974 | 0.4706 |
| C(12)   | 0.8456                  | 0.5381 | 0.596  |
| C(13)   | 0.8314                  | 0.4409 | 0.5781 |
| C(14)   | 0.7156                  | 0.4199 | 0.5703 |
| C(15)   | 0.6181                  | 0.498  | 0.5798 |
| C(16)   | 0.6371                  | 0.5958 | 0.596  |
| C(17)   | 0.5445                  | 0.686  | 0.6023 |
| C(18)   | 0.4203                  | 0.6827 | 0.5994 |
| C(19)   | 0.34                    | 0.7719 | 0.6022 |
| C(20)   | 0.3845                  | 0.8647 | 0.6061 |
| C(21)   | 0.5077                  | 0.868  | 0.6102 |
| C(22)   | 0.5891                  | 0.7786 | 0.6118 |
| C(23)   | 0.7911                  | 0.752  | 0.8821 |
| C(24)   | 0.8763                  | 0.8272 | 0.8458 |
| C(25)   | 0.9488                  | 0.85   | 0.9033 |
| C(26)   | 0.939                   | 0.7974 | 0.9979 |

Iridium/Graphene Nanostructured Catalyst for the N-Alkylation of Amines to Synthesize Nitrogen-containing Derivatives and Heterocyclic Compounds in Green Process

|       |        |        |        |
|-------|--------|--------|--------|
| C(27) | 0.8552 | 0.723  | 1.0351 |
| C(28) | 0.7818 | 0.6998 | 0.9783 |
| C(29) | 0.6707 | 0.5895 | 0.8416 |
| C(30) | 0.7795 | 0.5227 | 0.8379 |
| C(31) | 0.7732 | 0.4185 | 0.8545 |
| C(32) | 0.6577 | 0.3779 | 0.8731 |
| C(33) | 0.5508 | 0.4426 | 0.8743 |
| C(34) | 0.5559 | 0.5477 | 0.8601 |
| C(35) | 0.5323 | 0.7898 | 0.8829 |
| C(36) | 0.5192 | 0.8484 | 0.9643 |
| C(37) | 0.402  | 0.9006 | 1.0151 |
| C(38) | 0.2955 | 0.8935 | 0.9865 |
| C(39) | 0.3063 | 0.8351 | 0.9066 |
| C(40) | 0.4236 | 0.7845 | 0.8538 |
| Cl(2) | 0.3794 | 1.0782 | 0.786  |
| Cl(3) | 0.4363 | 1.2851 | 0.706  |
| C(41) | 0.4157 | 1.1654 | 0.6765 |
| Cl(4) | 0.8422 | 0.5053 | 1.2666 |
| Cl(5) | 0.8084 | 0.4252 | 1.0898 |
| C(42) | 0.8725 | 0.4002 | 1.1902 |



**Table S7.** The Atomic Coordinates (angstroms) of **Cat. 2**

| Element | Coordinates (Angstroms) |        |        |
|---------|-------------------------|--------|--------|
|         | X                       | Y      | Z      |
| Ir      | 0.8964                  | 0.8514 | 0.8235 |
| Cl      | 0.9558                  | 1.007  | 0.757  |
| P       | 1.0623                  | 0.7218 | 0.7016 |
| O(1)    | 1.2618                  | 0.2354 | 0.824  |
| O(2)    | 1.5173                  | 0.7842 | 0.5464 |
| O(3)    | 0.864                   | 0.7686 | 0.3754 |
| N(1)    | 0.9888                  | 0.8191 | 0.9234 |
| N(2)    | 0.7804                  | 0.8932 | 0.7414 |
| C(1)    | 1.0997                  | 0.7353 | 0.9208 |
| C(2)    | 1.1567                  | 0.7247 | 0.987  |
| C(3)    | 1.1004                  | 0.8008 | 1.0607 |
| C(4)    | 0.9867                  | 0.8836 | 1.067  |
| C(5)    | 0.9294                  | 0.892  | 0.9989 |
| C(6)    | 0.8055                  | 0.9717 | 1.002  |
| C(7)    | 0.7294                  | 1.0521 | 1.0752 |
| C(8)    | 0.6112                  | 1.118  | 1.0781 |
| C(9)    | 0.5673                  | 1.1062 | 1.0079 |
| C(10)   | 0.6422                  | 1.0305 | 0.934  |
| C(11)   | 0.7641                  | 0.9621 | 0.928  |
| C(12)   | 0.7548                  | 0.9813 | 0.6837 |
| C(13)   | 0.6752                  | 1.0053 | 0.63   |
| C(14)   | 0.6223                  | 0.9342 | 0.6364 |
| C(15)   | 0.6464                  | 0.844  | 0.6974 |
| C(16)   | 0.7258                  | 0.8233 | 0.7513 |
| C(17)   | 0.7538                  | 0.7347 | 0.8214 |
| C(18)   | 0.708                   | 0.6534 | 0.8419 |
| C(19)   | 0.7345                  | 0.5764 | 0.9117 |
| C(20)   | 0.8042                  | 0.5804 | 0.9646 |
| C(21)   | 0.8515                  | 0.659  | 0.9459 |
| C(22)   | 0.8297                  | 0.7366 | 0.8721 |
| C(23)   | 1.1298                  | 0.5714 | 0.7327 |
| C(24)   | 1.0568                  | 0.5122 | 0.7655 |
| C(25)   | 1.1051                  | 0.4003 | 0.7935 |

Iridium/Graphene Nanostructured Catalyst for the N-Alkylation of Amines to Synthesize Nitrogen-containing Derivatives and Heterocyclic Compounds in Green Process

|       |        |        |        |
|-------|--------|--------|--------|
| C(26) | 1.2241 | 0.3457 | 0.7941 |
| C(27) | 1.2966 | 0.402  | 0.7639 |
| C(28) | 1.2492 | 0.5127 | 0.7334 |
| C(29) | 1.1986 | 0.7465 | 0.6504 |
| C(30) | 1.2769 | 0.7006 | 0.5626 |
| C(31) | 1.383  | 0.7117 | 0.5244 |
| C(32) | 1.4144 | 0.7682 | 0.5748 |
| C(33) | 1.3392 | 0.8136 | 0.6628 |
| C(34) | 1.2315 | 0.8044 | 0.6996 |
| C(35) | 1.0152 | 0.7264 | 0.5965 |
| C(36) | 0.9982 | 0.8207 | 0.5385 |
| C(37) | 0.9506 | 0.8387 | 0.4626 |
| C(38) | 0.9152 | 0.7594 | 0.4455 |
| C(39) | 0.933  | 0.6648 | 0.502  |
| C(40) | 0.982  | 0.6482 | 0.5755 |
| C(41) | 1.378  | 0.1789 | 0.8403 |
| C(42) | 1.6002 | 0.7363 | 0.456  |
| C(43) | 0.8274 | 0.8713 | 0.3266 |
| C(44) | 0.4886 | 0.4874 | 0.8491 |
| C(45) | 0.5581 | 0.3703 | 0.8623 |
| C(46) | 0.6621 | 0.2973 | 0.804  |
| C(47) | 0.7201 | 0.3369 | 0.7246 |
| C(48) | 0.6563 | 0.4548 | 0.7055 |
| C(49) | 0.5508 | 0.5147 | 0.7673 |
| C(50) | 0.7246 | 0.4914 | 0.6265 |

**Table S8.** The Atomic Coordinates (angstroms) of **Cat. 3**

| Element | Coordinates (Angstroms) |        |        |
|---------|-------------------------|--------|--------|
|         | X                       | Y      | Z      |
| Ir      | 0.725                   | 0.7304 | 0.8709 |
| Cl(1)   | 0.5027                  | 0.7644 | 0.8677 |
| P       | 0.7921                  | 0.7724 | 0.6941 |
| F(1)    | 0.4696                  | 0.6998 | 0.4418 |
| F(2)    | 0.8192                  | 1.2165 | 0.6362 |
| F(3)    | 1.2715                  | 0.5571 | 0.481  |
| N(1)    | 0.7196                  | 0.5765 | 0.8666 |
| N(2)    | 0.7384                  | 0.8774 | 0.8988 |
| C(1)    | 0.761                   | 0.5227 | 0.7858 |
| C(2)    | 0.751                   | 0.4193 | 0.7881 |
| C(3)    | 0.6968                  | 0.3698 | 0.8771 |
| C(4)    | 0.6592                  | 0.4222 | 0.9597 |
| C(5)    | 0.6728                  | 0.5266 | 0.9558 |
| C(6)    | 0.6423                  | 0.5881 | 1.0406 |
| C(7)    | 0.596                   | 0.5496 | 1.1374 |
| C(8)    | 0.5678                  | 0.6125 | 1.2152 |
| C(9)    | 0.5873                  | 0.7146 | 1.1946 |
| C(10)   | 0.633                   | 0.7524 | 1.0984 |
| C(11)   | 0.662                   | 0.691  | 1.0188 |
| C(12)   | 0.897                   | 0.7162 | 0.8884 |
| C(13)   | 0.978                   | 0.6261 | 0.8913 |
| C(14)   | 1.096                   | 0.6303 | 0.8992 |
| C(15)   | 1.1415                  | 0.7207 | 0.9039 |
| C(16)   | 1.0651                  | 0.8092 | 0.9048 |
| C(17)   | 0.9417                  | 0.808  | 0.8997 |
| C(18)   | 0.8504                  | 0.8975 | 0.9071 |
| C(19)   | 0.871                   | 0.9934 | 0.9236 |
| C(20)   | 0.7755                  | 1.0705 | 0.9352 |
| C(21)   | 0.6604                  | 1.0504 | 0.929  |
| C(22)   | 0.6446                  | 0.9553 | 0.9078 |
| C(23)   | 0.6891                  | 0.7517 | 0.6196 |
| C(24)   | 0.6053                  | 0.6793 | 0.6471 |
| C(25)   | 0.5325                  | 0.6612 | 0.5866 |

Iridium/Graphene Nanostructured Catalyst for the N-Alkylation of Amines to Synthesize Nitrogen-containing Derivatives and Heterocyclic Compounds in Green Process

|       |        |        |        |
|-------|--------|--------|--------|
| C(26) | 0.5437 | 0.7174 | 0.4991 |
| C(27) | 0.6239 | 0.7881 | 0.4685 |
| C(28) | 0.6973 | 0.8076 | 0.526  |
| C(29) | 0.8088 | 0.9079 | 0.6668 |
| C(30) | 0.7014 | 0.9729 | 0.6796 |
| C(31) | 0.7047 | 1.0766 | 0.6691 |
| C(32) | 0.8141 | 1.1132 | 0.645  |
| C(33) | 0.9239 | 1.0543 | 0.6286 |
| C(34) | 0.9224 | 0.9486 | 0.6397 |
| C(35) | 0.9413 | 0.7099 | 0.6244 |
| C(36) | 0.9509 | 0.6576 | 0.5413 |
| C(37) | 1.0621 | 0.6076 | 0.4932 |
| C(38) | 1.1605 | 0.6081 | 0.527  |
| C(39) | 1.1591 | 0.6576 | 0.6083 |
| C(40) | 1.0454 | 0.7105 | 0.658  |
| C(41) | 1.6527 | 1.0955 | 0.3002 |
| Cl(2) | 1.7119 | 1.0798 | 0.3969 |
| Cl(3) | 1.6722 | 0.9931 | 0.2304 |
| C(42) | 0.9263 | 0.6755 | 0.1729 |
| Cl(4) | 0.9438 | 0.7938 | 0.1981 |
| Cl(5) | 0.8887 | 0.594  | 0.2764 |

**Table S9.** The Atomic Coordinates (angstroms) of **Cat. 4**

| Element | Coordinates (Angstroms) |        |        |
|---------|-------------------------|--------|--------|
|         | X                       | Y      | Z      |
| Ir      | 0.511                   | 0.7363 | 0.7205 |
| Cl(1)   | 0.561                   | 0.5513 | 0.7569 |
| P(1)    | 0.315                   | 0.7038 | 0.822  |
| O(1)    | 0.5651                  | 0.9519 | 0.8824 |
| O(2)    | 0.5915                  | 0.6509 | 0.4673 |
| O(3)    | -0.0817                 | 0.9722 | 0.7878 |
| O(4)    | 0.1251                  | 0.2567 | 0.8572 |
| O(5)    | 0.3272                  | 0.7889 | 1.175  |
| N(1)    | 0.5561                  | 0.8024 | 0.8176 |
| N(2)    | 0.4954                  | 0.6897 | 0.6055 |
| C(1)    | 0.482                   | 0.8949 | 0.6936 |
| C(2)    | 0.4478                  | 0.9425 | 0.6282 |
| C(3)    | 0.4283                  | 1.0527 | 0.6249 |
| C(4)    | 0.4419                  | 1.1172 | 0.6866 |
| C(5)    | 0.4785                  | 1.0735 | 0.7509 |
| C(6)    | 0.5005                  | 0.9622 | 0.7544 |
| C(7)    | 0.5393                  | 0.9057 | 0.8178 |
| C(8)    | 0.5984                  | 0.7737 | 0.884  |
| C(9)    | 0.6335                  | 0.6772 | 0.9122 |
| C(10)   | 0.6704                  | 0.6785 | 0.9833 |
| C(11)   | 0.6689                  | 0.771  | 1.0258 |
| C(12)   | 0.6348                  | 0.8684 | 0.9973 |
| C(13)   | 0.6022                  | 0.8652 | 0.925  |
| C(14)   | 0.6829                  | 0.7521 | 0.6363 |
| C(15)   | 0.779                   | 0.7845 | 0.6565 |
| C(16)   | 0.8868                  | 0.7846 | 0.592  |
| C(17)   | 0.9056                  | 0.7458 | 0.5118 |
| C(18)   | 0.8118                  | 0.7105 | 0.4927 |
| C(19)   | 0.7032                  | 0.7136 | 0.5553 |
| C(20)   | 0.5976                  | 0.6821 | 0.5427 |
| C(21)   | 0.4137                  | 0.6636 | 0.5679 |
| C(22)   | 0.295                   | 0.6601 | 0.5995 |
| C(23)   | 0.2409                  | 0.6253 | 0.5441 |

Iridium/Graphene Nanostructured Catalyst for the N-Alkylation of Amines to Synthesize Nitrogen-containing Derivatives and Heterocyclic Compounds in Green Process

|       |         |        |        |
|-------|---------|--------|--------|
| C(24) | 0.3049  | 0.5957 | 0.46   |
| C(25) | 0.4227  | 0.6005 | 0.4284 |
| C(26) | 0.4753  | 0.6361 | 0.4833 |
| C(27) | 0.1929  | 0.7858 | 0.8114 |
| C(28) | 0.2064  | 0.8969 | 0.7964 |
| C(29) | 0.1172  | 0.9616 | 0.7881 |
| C(30) | 0.0118  | 0.9161 | 0.7953 |
| C(31) | -0.0631 | 1.081  | 0.7537 |
| C(32) | -0.0037 | 0.8068 | 0.8113 |
| C(33) | 0.0854  | 0.741  | 0.8194 |
| C(34) | 0.2578  | 0.5665 | 0.8354 |
| C(35) | 0.1726  | 0.5284 | 0.9131 |
| C(36) | 0.126   | 0.4253 | 0.9227 |
| C(37) | 0.1634  | 0.3594 | 0.8535 |
| C(38) | 0.0363  | 0.2166 | 0.9351 |
| C(39) | 0.2472  | 0.3963 | 0.776  |
| C(40) | 0.2945  | 0.498  | 0.7678 |
| C(41) | 0.3106  | 0.7262 | 0.9331 |
| C(42) | 0.2761  | 0.8246 | 0.9711 |
| C(43) | 0.2823  | 0.8422 | 1.0513 |
| C(44) | 0.3235  | 0.7635 | 1.0962 |
| C(45) | 0.3597  | 0.666  | 1.0594 |
| C(46) | 0.3534  | 0.6497 | 0.9785 |
| C(47) | 0.3606  | 0.7064 | 1.2258 |
| C(48) | 0.2499  | 0.952  | 0.4606 |
| Cl(2) | 0.1969  | 0.89   | 0.401  |
| Cl(3) | 0.1779  | 0.9466 | 0.5697 |
| C(49) | 1.1155  | 0.4654 | 0.277  |
| Cl(4) | 1.0567  | 0.5453 | 0.3624 |
| Cl(5) | 1.0936  | 0.5062 | 0.184  |

**Table S10.** The Atomic Coordinates (angstroms) of **Cat. 5**

| Element | Coordinates (Angstroms) |         |         |
|---------|-------------------------|---------|---------|
|         | X                       | Y       | Z       |
| Ir      | -0.0006                 | 0.199   | 0.2292  |
| Cl(1)   | 0.076                   | 0.2524  | 0.3393  |
| Cl(2)   | 0.4901                  | 0.0055  | 0.1231  |
| Cl(3)   | 0.2126                  | 0.4665  | 0.0853  |
| P       | -0.1923                 | 0.3377  | 0.2416  |
| O(1)    | 0.0945                  | -0.0768 | 0.3828  |
| O(2)    | -0.0768                 | 0.1732  | -0.0091 |
| O(3)    | -0.2687                 | 0.7823  | 0.2496  |
| O(4)    | -0.49                   | 0.308   | -0.0233 |
| O(5)    | -0.4317                 | 0.3383  | 0.5706  |
| N(1)    | -0.0148                 | 0.076   | 0.3176  |
| N(2)    | -0.0537                 | 0.1517  | 0.1261  |
| C(1)    | 0.1704                  | 0.0802  | 0.2217  |
| C(2)    | 0.2637                  | 0.0813  | 0.1735  |
| C(3)    | 0.3734                  | 0.0027  | 0.185   |
| C(4)    | 0.3958                  | -0.0778 | 0.2441  |
| C(5)    | 0.3041                  | -0.0805 | 0.2932  |
| C(6)    | 0.1917                  | -0.0016 | 0.2815  |
| C(7)    | 0.0901                  | 0.001   | 0.3281  |
| C(8)    | -0.0885                 | 0.0457  | 0.3704  |
| C(9)    | -0.0193                 | -0.0482 | 0.4105  |
| C(10)   | -0.0609                 | -0.1024 | 0.4682  |
| C(11)   | -0.1796                 | -0.0575 | 0.4853  |
| C(12)   | -0.2516                 | 0.0365  | 0.4446  |
| C(13)   | -0.2084                 | 0.0888  | 0.3867  |
| C(14)   | 0.0418                  | 0.2848  | 0.1388  |
| C(15)   | 0.1038                  | 0.3469  | 0.1448  |
| C(16)   | 0.1359                  | 0.3901  | 0.0734  |
| C(17)   | 0.111                   | 0.3753  | -0.0047 |
| C(18)   | 0.0513                  | 0.3148  | -0.0134 |
| C(19)   | 0.0187                  | 0.2695  | 0.0576  |
| C(20)   | -0.0364                 | 0.1985  | 0.0576  |
| C(21)   | -0.1071                 | 0.0887  | 0.1065  |

Iridium/Graphene Nanostructured Catalyst for the N-Alkylation of Amines to Synthesize Nitrogen-containing Derivatives and Heterocyclic Compounds in Green Process

|       |         |         |         |
|-------|---------|---------|---------|
| C(22) | -0.1227 | 0.1041  | 0.0214  |
| C(23) | -0.1772 | 0.0565  | -0.0209 |
| C(24) | -0.2153 | -0.0094 | 0.0269  |
| C(25) | -0.1999 | -0.026  | 0.1109  |
| C(26) | -0.1435 | 0.0218  | 0.1527  |
| C(27) | -0.2064 | 0.4732  | 0.2322  |
| C(28) | -0.1215 | 0.4974  | 0.2613  |
| C(29) | -0.1382 | 0.5994  | 0.2681  |
| C(30) | -0.242  | 0.6786  | 0.2441  |
| C(31) | -0.3245 | 0.6561  | 0.2127  |
| C(32) | -0.312  | 0.5554  | 0.2073  |
| C(33) | -0.2036 | 0.8107  | 0.3026  |
| C(34) | -0.2884 | 0.3341  | 0.1639  |
| C(35) | -0.2982 | 0.3863  | 0.0863  |
| C(36) | -0.3652 | 0.3765  | 0.0256  |
| C(37) | -0.4252 | 0.3128  | 0.0396  |
| C(38) | -0.4145 | 0.2579  | 0.1142  |
| C(39) | -0.3464 | 0.2692  | 0.1743  |
| C(40) | -0.5448 | 0.238   | -0.0113 |
| C(41) | -0.2734 | 0.3434  | 0.3405  |
| C(42) | -0.3935 | 0.3765  | 0.3464  |
| C(43) | -0.4494 | 0.3758  | 0.4229  |
| C(44) | -0.3854 | 0.3445  | 0.4932  |
| C(45) | -0.2659 | 0.3153  | 0.4885  |
| C(46) | -0.2118 | 0.3145  | 0.4135  |
| C(47) | -0.5547 | 0.3649  | 0.5782  |



**Table S11.** The Atomic Coordinates (angstroms) of **Cat. 6**

| Element | Coordinates (Angstroms) |        |        |
|---------|-------------------------|--------|--------|
|         | X                       | Y      | Z      |
| Ir      | -0.4923                 | 0.2622 | 0.5172 |
| Cl      | -0.6112                 | 0.3043 | 0.5079 |
| P       | -0.4891                 | 0.2389 | 0.4174 |
| F(1)    | -0.5436                 | 0.3746 | 0.7576 |
| F(2)    | -0.5403                 | 0.1875 | 0.644  |
| F(3)    | -0.2251                 | 0.1061 | 0.5802 |
| F(4)    | -0.3221                 | 0.3098 | 0.5361 |
| O(1)    | -0.446                  | 0.4514 | 0.5655 |
| O(2)    | -0.4938                 | 0.0655 | 0.5547 |
| N(1)    | -0.4557                 | 0.3583 | 0.516  |
| N(2)    | -0.5237                 | 0.1676 | 0.5307 |
| C(1)    | -0.4237                 | 0.4052 | 0.4812 |
| C(2)    | -0.3968                 | 0.4037 | 0.4276 |
| C(3)    | -0.3696                 | 0.4607 | 0.4058 |
| C(4)    | -0.3683                 | 0.5191 | 0.4385 |
| C(5)    | -0.3926                 | 0.5206 | 0.4931 |
| C(6)    | -0.4194                 | 0.4627 | 0.5121 |
| C(7)    | -0.4664                 | 0.3882 | 0.5644 |
| C(8)    | -0.4929                 | 0.3549 | 0.613  |
| C(9)    | -0.5051                 | 0.3847 | 0.6645 |
| C(10)   | -0.5293                 | 0.347  | 0.7067 |
| C(11)   | -0.5424                 | 0.281  | 0.6999 |
| C(12)   | -0.5287                 | 0.2524 | 0.6478 |
| C(13)   | -0.5052                 | 0.2867 | 0.6017 |
| C(14)   | -0.5855                 | 0.13   | 0.5338 |
| C(15)   | -0.6558                 | 0.1442 | 0.5241 |
| C(16)   | -0.7017                 | 0.0924 | 0.5298 |
| C(17)   | -0.6804                 | 0.0297 | 0.5452 |
| C(18)   | -0.6115                 | 0.0151 | 0.5549 |
| C(19)   | -0.5657                 | 0.067  | 0.5488 |
| C(20)   | -0.4732                 | 0.1272 | 0.5434 |
| C(21)   | -0.4028                 | 0.1507 | 0.5474 |
| C(22)   | -0.3462                 | 0.1113 | 0.5616 |

Iridium/Graphene Nanostructured Catalyst for the N-Alkylation of Amines to Synthesize Nitrogen-containing Derivatives and Heterocyclic Compounds in Green Process

|        |         |        |        |
|--------|---------|--------|--------|
| C(23)  | -0.2828 | 0.1422 | 0.566  |
| C(24)  | -0.2744 | 0.2088 | 0.5584 |
| C(25)  | -0.3334 | 0.2447 | 0.5445 |
| C(26)  | -0.3989 | 0.2192 | 0.537  |
| C(27)  | -0.5047 | 0.3066 | 0.3683 |
| C(28)  | -0.5492 | 0.3565 | 0.3817 |
| C(29)  | -0.5598 | 0.4091 | 0.345  |
| C(30)  | -0.5258 | 0.4114 | 0.2945 |
| C(31)  | -0.481  | 0.3614 | 0.2803 |
| C(32)  | -0.4712 | 0.3093 | 0.3163 |
| C(34)  | -0.4089 | 0.2008 | 0.3898 |
| C(35)  | -0.4094 | 0.1546 | 0.3474 |
| C(36)  | -0.3465 | 0.1281 | 0.328  |
| C(37)  | -0.2839 | 0.1478 | 0.3501 |
| C(38)  | -0.2832 | 0.195  | 0.3901 |
| C(39)  | -0.3449 | 0.2216 | 0.4101 |
| C(41)  | -0.5573 | 0.1803 | 0.3984 |
| C(42)  | -0.6216 | 0.2006 | 0.3782 |
| C(43)  | -0.6744 | 0.155  | 0.3683 |
| C(44)  | -0.6626 | 0.0899 | 0.3767 |
| C(45)  | -0.5994 | 0.0689 | 0.3954 |
| C(46)  | -0.5479 | 0.113  | 0.4071 |
| O(6)   | -0.2601 | 0.2966 | 0.2326 |
| C(48)  | -0.3277 | 0.2685 | 0.2081 |
| O(7)   | -0.2796 | 0.3926 | 0.2342 |
| O(8)   | -0.2157 | 0.363  | 0.2925 |
| O(3)   | -0.5484 | 0.466  | 0.2586 |
| O(4)   | -0.2114 | 0.1296 | 0.3373 |
| O(5)   | -0.7096 | 0.0383 | 0.3721 |
| C(33)  | -0.5156 | 0.4656 | 0.206  |
| C(40)  | -0.2127 | 0.0799 | 0.2918 |
| C(47)  | -0.7839 | 0.0557 | 0.3716 |
| O(3')  | -0.526  | 0.465  | 0.2666 |
| O(4')  | -0.2312 | 0.1171 | 0.328  |
| O(5')  | -0.723  | 0.0504 | 0.3594 |
| C(33') | -0.481  | 0.47   | 0.208  |
| C(40') | -0.1648 | 0.1397 | 0.3239 |
| C(47') | -0.79   | 0.075  | 0.35   |

**Table S12.** The Atomic Coordinates (angstroms) of **Cat. 7**

| Element | Coordinates (Angstroms) |        |        |
|---------|-------------------------|--------|--------|
|         | X                       | Y      | Z      |
| Ir      | 0.6904                  | 0.9199 | 0.7672 |
| Cl(1)   | 0.5279                  | 0.932  | 0.7012 |
| Cl(2)   | 0.5174                  | 0.8252 | 0.3538 |
| Cl(3)   | 0.8799                  | 1.3686 | 1.1086 |
| P       | 0.816                   | 1.1163 | 0.7572 |
| O(1)    | 0.8313                  | 0.7762 | 0.5767 |
| O(2)    | 0.5436                  | 0.8778 | 0.9966 |
| O(3)    | 0.858                   | 1.0872 | 0.3739 |
| O(4)    | 1.2978                  | 1.36   | 0.9435 |
| O(5)    | 0.6406                  | 1.4579 | 0.8615 |
| N(1)    | 0.7265                  | 0.8541 | 0.6473 |
| N(2)    | 0.6503                  | 0.9534 | 0.8942 |
| C(1)    | 0.6947                  | 0.828  | 0.5568 |
| C(2)    | 0.6181                  | 0.8416 | 0.509  |
| C(3)    | 0.6118                  | 0.8096 | 0.4182 |
| C(4)    | 0.6815                  | 0.7671 | 0.3761 |
| C(5)    | 0.7558                  | 0.7505 | 0.4225 |
| C(6)    | 0.7606                  | 0.7811 | 0.5125 |
| C(7)    | 0.8045                  | 0.8202 | 0.6554 |
| C(8)    | 0.8559                  | 0.8331 | 0.7397 |
| C(9)    | 0.9374                  | 0.7994 | 0.7538 |
| C(10)   | 0.9762                  | 0.8156 | 0.84   |
| C(11)   | 0.9347                  | 0.8636 | 0.9103 |
| C(12)   | 0.858                   | 0.9011 | 0.8946 |
| C(13)   | 0.8138                  | 0.8864 | 0.809  |
| C(14)   | 0.6864                  | 1.0425 | 0.9713 |
| C(15)   | 0.771                   | 1.1583 | 0.9954 |
| C(16)   | 0.7788                  | 1.2226 | 1.0781 |
| C(17)   | 0.7054                  | 1.1749 | 1.1382 |
| C(18)   | 0.6258                  | 1.0607 | 1.1186 |
| C(19)   | 0.6182                  | 0.9957 | 1.0339 |
| C(20)   | 0.5681                  | 0.8593 | 0.9116 |
| C(21)   | 0.5182                  | 0.7489 | 0.85   |

Iridium/Graphene Nanostructured Catalyst for the N-Alkylation of Amines to Synthesize Nitrogen-containing Derivatives and Heterocyclic Compounds in Green Process

|       |        |        |        |
|-------|--------|--------|--------|
| C(22) | 0.4294 | 0.646  | 0.8626 |
| C(23) | 0.3931 | 0.5444 | 0.7948 |
| C(24) | 0.4399 | 0.5469 | 0.7191 |
| C(25) | 0.5287 | 0.6516 | 0.7063 |
| C(26) | 0.57   | 0.7541 | 0.7713 |
| C(27) | 0.8352 | 1.1175 | 0.642  |
| C(28) | 0.9206 | 1.1014 | 0.5991 |
| C(29) | 0.9244 | 1.0906 | 0.5099 |
| C(30) | 0.8453 | 1.0993 | 0.4604 |
| C(31) | 0.7599 | 1.1173 | 0.5008 |
| C(32) | 0.7545 | 1.1251 | 0.59   |
| C(33) | 0.7778 | 1.0909 | 0.3177 |
| C(34) | 0.9627 | 1.1919 | 0.8148 |
| C(35) | 1.0127 | 1.3036 | 0.8723 |
| C(36) | 1.1212 | 1.3535 | 0.9139 |
| C(37) | 1.1874 | 1.2966 | 0.8988 |
| C(38) | 1.1395 | 1.1846 | 0.8422 |
| C(39) | 1.0295 | 1.1334 | 0.802  |
| C(40) | 1.3677 | 1.3101 | 0.9357 |
| C(41) | 0.7667 | 1.2244 | 0.7916 |
| C(42) | 0.8211 | 1.3307 | 0.7713 |
| C(43) | 0.7848 | 1.4131 | 0.7958 |
| C(44) | 0.6878 | 1.3871 | 0.8372 |
| C(45) | 0.6334 | 1.2813 | 0.8589 |
| C(46) | 0.6708 | 1.2001 | 0.8351 |
| C(47) | 0.6939 | 1.5701 | 0.8419 |
| C(48) | 0.662  | 1.396  | 0.454  |
| Cl(4) | 0.7296 | 1.3613 | 0.5318 |
| Cl(5) | 0.6172 | 1.4754 | 0.538  |
| O(6') | 0.888  | 1.568  | 0.324  |
| O(6)  | 0.924  | 1.564  | 0.397  |
